# Supplementary material
Source: PubMed Central journal article supplement (PMC5870800)

Figure S1: Within subject changes in a) logical memory I b) logical memory II and c) digit symbol post-transplant. Each line represents each of the 11 patients. An improvement in these neuropsychological tests was observed across majority of patients. LM I\_Pre, logical memory I pre-transplant; LM I\_Post, logical memory I post-transplant; LM II\_Pre, logical memory II pre-transplant; LM II\_Post, logical memory II post-transplant; D Sym\_Pre, digit symbol pre-transplant; D Sym\_Post, digit symbol post-transplant.

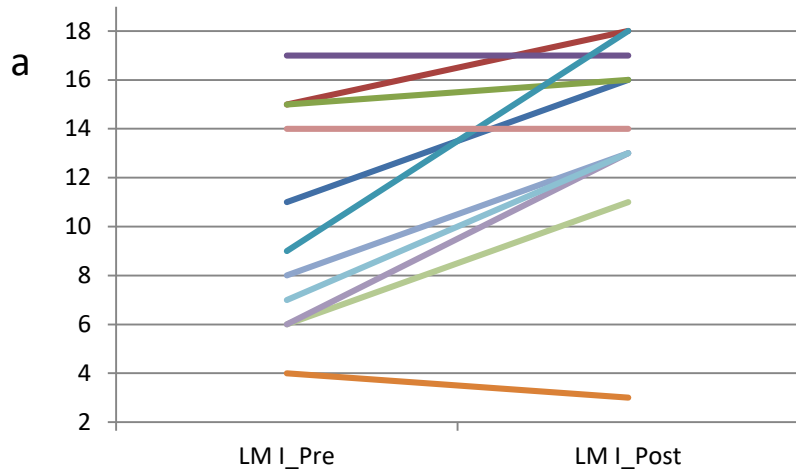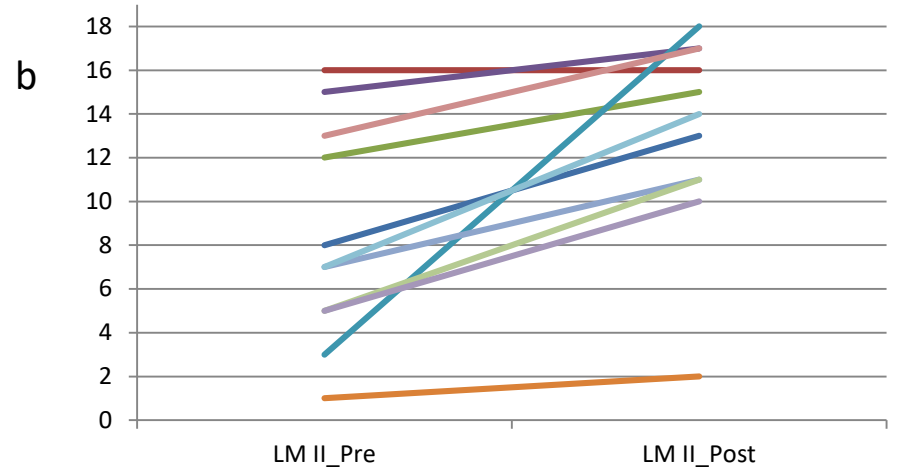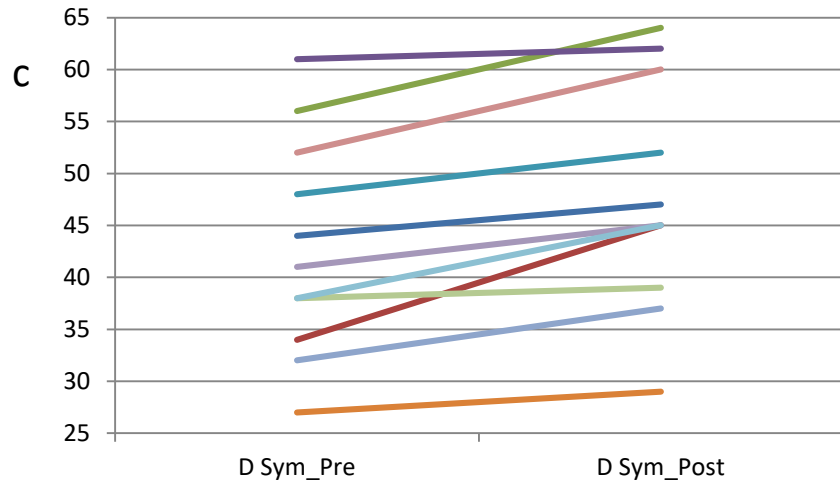

Supplement: NIHMS950867-supplement-Supplemental_Figure_1.pdf [file NIHMS950867-supplement-Supplemental_Figure_1.pdf]
