# Supplementary material
Source: PubMed Central journal article supplement (PMC5870800)

Figure S 2: Within subject changes in FA at the a) body of corpus callosum b) cingulate gyrus and c) forceps minor. Each line represents the FA of each of the 11 patients. The increase in FA was observed across majority of patients .  
 FA, fractional anisotropy; BodyCC\_Pre, FA at the body of corpus callosum pre-transplant; BodyCC\_Post, FA at the body of corpus callosum post-transplant; CingCG\_Pre, FA at the cingulate gyrus pre-transplant; CingCG\_Post, FA at the cingulate gyrus post-transplant; Fmi\_Pre, FA at the forceps minor pre-transplant; Fmi\_Post, FA at the forceps minor post-transplant.

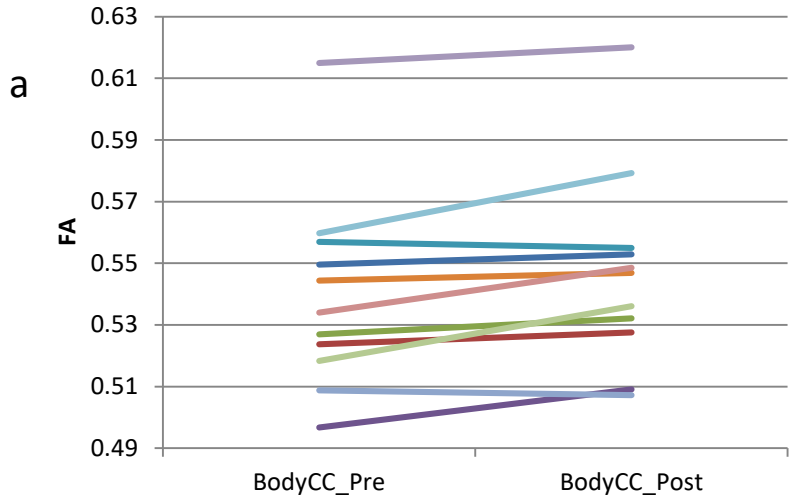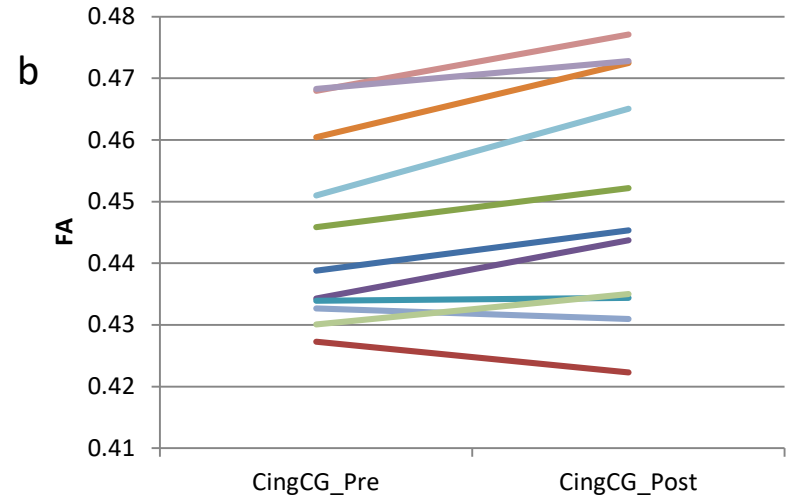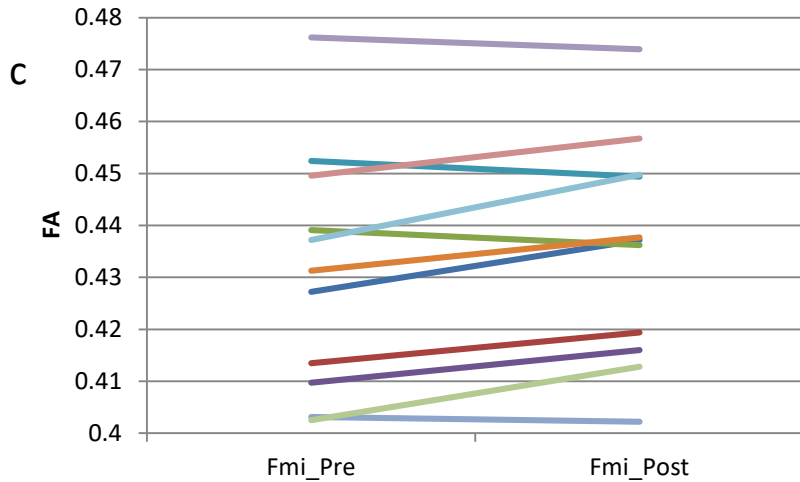

Supplement: NIHMS950867-supplement-Supplemental_Figure_2.pdf [file NIHMS950867-supplement-Supplemental_Figure_2.pdf]
