# Supplementary material
Source: PubMed Central journal article supplement (PMC5870800)

Figure S 3: Within subject changes in MD at the a) forceps major and b) splenium of the corpus callosum. Each line represents the MD of each of the 11 patients. The decrease in MD was observed across majority of patients . MD, mean diffusivity; Fma\_Pre, MD at the forceps major pre-transplant; Fma\_Post, MD at the forceps major post-transplant; Splenium CC\_Pre, MD at the splenium of the corpus callosum pre-transplant; Splenium CC\_Post, MD at the splenium of the corpus callosum post-transplant.

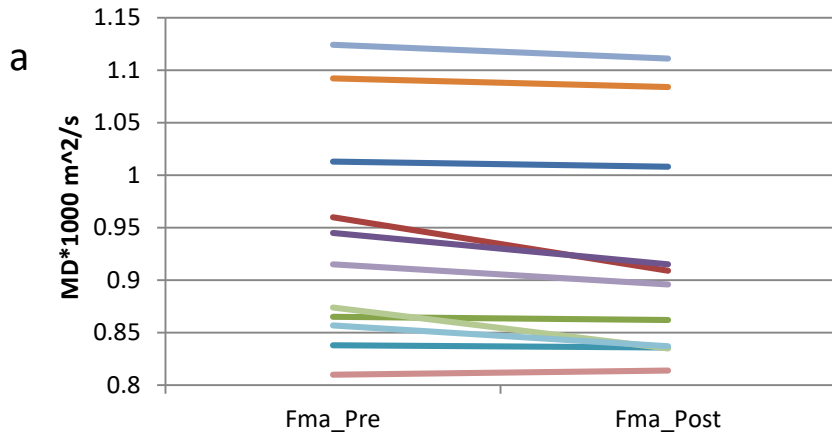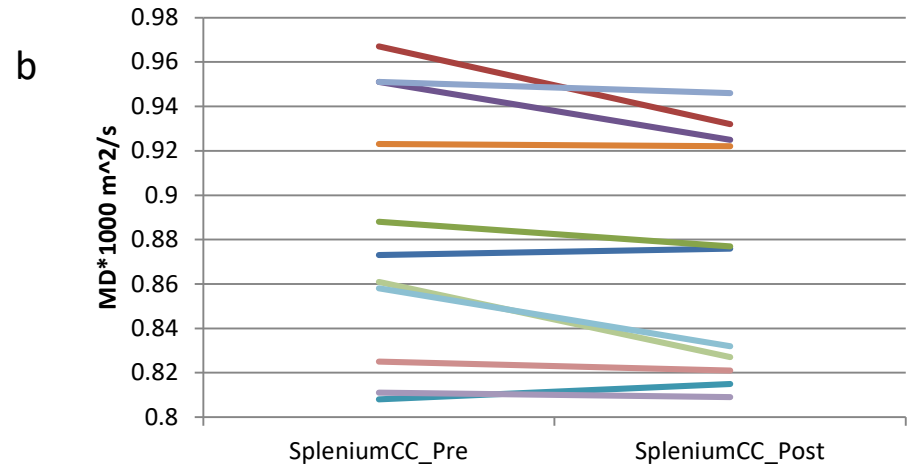

Supplement: NIHMS950867-supplement-Supplemental_Figure_3.pdf [file NIHMS950867-supplement-Supplemental_Figure_3.pdf]
