# Supplementary material
Source: PubMed Central journal article supplement (PMC5870800)
Supplement: NIHMS950867-supplement-Supplemental_Table_1.pdf [file NIHMS950867-supplement-Supplemental_Table_1.pdf]

Table S1: Battery of neuropsychological (NP) tests used

| <b>NP Test</b>                            | <b>Test description</b>                                                                                                                                                                                                                        | <b>Cognitive domain tested</b>                                          |
|-------------------------------------------|------------------------------------------------------------------------------------------------------------------------------------------------------------------------------------------------------------------------------------------------|-------------------------------------------------------------------------|
| Mini mental state exam[1]                 | A widely acceptable 30-point questionnaire used for screening of dementia.                                                                                                                                                                     | Global cognition                                                        |
| Digit span[2]                             | The participants were presented with a series of digits, which they repeated. If successful, they were given a longer list. The length of the longest list repeated was recorded. An average of the forward and backward digit span was taken. | Working memory                                                          |
| Logical memory I and logical memory II[2] | A short story was narrated. The participants were asked to recall the story immediately after hearing it (logical memory I) and 20 minutes later (logical memory II).                                                                          | Immediate memory and retrieval from verbal short-term memory storage    |
| Category fluency[3]                       | Participants named as many words as possible from two categories; animals and vegetables in 60 seconds respectively. The average of the 2 was taken as a composite score for category fluency.                                                 | Verbal Fluency                                                          |
| Trail making tests[4]                     | In trail making A, the participants connected 25 consecutive numbered targets in a sequential order. In trail making B, they alternated between numbers and letters. The 2 scores were averaged.                                               | Attention, processing speed, motor speed and visual scanning            |
| Digit symbol test[5]                      | The participants matched corresponding symbol for a row of digits as fast as possible. The number of correct symbols within 90 seconds was measured.                                                                                           | Executive function, problem solving, processing speed and concentration |
| Block design[2]                           | The participants rearranged blocks with different color patterns on different sides to match a given pattern.                                                                                                                                  | Special visualization and motor skill                                   |
| Stroop test[6]                            | In the first step, the participants named the written color name (which differed from the color it is printed in). Then they named the color it is printed in (which differed from the color written).                                         | Attention and processing speed                                          |
| Free and cued recall[7]                   | The participants were asked to search a card containing four pictures for an item in a unique category cue. They identified the items and recalled them. This was done for 16 items. They                                                      | Visual perception and memory                                            |

|  |                                                                                                                                                                   |  |
|--|-------------------------------------------------------------------------------------------------------------------------------------------------------------------|--|
|  | <p>then had 3 trials of recall, each with free recall followed by cued recall for items not retrieved. The sum of free recall from the 3 trials was recorded.</p> |  |
|--|-------------------------------------------------------------------------------------------------------------------------------------------------------------------|--|

Additional References:

References [1-7] describe the NP tests, while [8-11] describe DTI measurement

1. Tombaugh TN, McIntyre NJ. The mini-mental state examination: a comprehensive review. *J Am Geriatr Soc* 1992,**40**:922-935.
2. Wechsler D. *Administration and scoring manual: Wechsler Adult Intelligence Scale*. San Antonio, TX: Harcourt Brace; 1997.
3. Goodglass H, Kaplan E. *Boston Naming Test scoring booklet*. Philadelphia: Lea & Febiger; 1983.
4. Armitage SG. An analysis of certain psychological tests used for the evaluation of brain injury. *Psychological Monographs* 1946,**60**:277.
5. Wechsler D. *Wechsler Memory Scale III: Administration and scoring manual*. Orlando, FL: Psychological Corporation; 1997.
6. Stroop J. Studies of interference in serial verbal reactions. *J Exp Psychol* 1935,**18**:643-662.
7. Buschke H, Sliwinski MJ, Kuslansky G, Lipton RB. Diagnosis of early dementia by the Double Memory Test: encoding specificity improves diagnostic sensitivity and specificity. *Neurology* 1997,**48**:989-997.
8. Nunes RG, Drobnjak I, Clare S, Jezzard P, Jenkinson M. Performance of single spin-echo and doubly refocused diffusion-weighted sequences in the presence of eddy current fields with multiple components. *Magn Reson Imaging* 2011,**29**:659-667.
9. Jones DK, Simmons A, Williams SC, Horsfield MA. Non-invasive assessment of axonal fiber connectivity in the human brain via diffusion tensor MRI. *Magn Reson Med* 1999,**42**:37-41.
10. Smith SM, Jenkinson M, Woolrich MW, Beckmann CF, Behrens TE, Johansen-Berg H, *et al*. Advances in functional and structural MR image analysis and implementation as FSL. *Neuroimage* 2004,**23 Suppl 1**:S208-219.
11. Mori S, van Zijl PC. Fiber tracking: principles and strategies - a technical review. *NMR Biomed* 2002,**15**:468-480.
