# Supplementary material
Source: PubMed Central journal article supplement (PMC5870800)
Supplement: NIHMS950867-supplement-Supplemental_Table_2.pdf [file NIHMS950867-supplement-Supplemental_Table_2.pdf]

Table S2: Within subject pre- and post-transplant characteristics

|                          | <b>Pre-transplant</b> | <b>Post-transplant</b> |
|--------------------------|-----------------------|------------------------|
| systolic blood pressure  | 141 ± 19              | 142 ± 23               |
| diastolic blood pressure | 78 ± 12               | 77 ± 11                |
| weight (kilograms)       | 93 ± 12               | 93 ± 11                |
| BMI                      | 31.4 ± 3.5            | 31.2 ± 2.7             |
| hemoglobin               | 11 ± 1.4              | 13.7 ± 1.5             |
| hematocrit               | 32.8 ± 4.4            | 40.9 ± 4.2             |
| albumin                  | 4.2 ± 0.4             | 4.4 ± 0.2              |
