# Supplementary material
Source: PubMed Central journal article supplement (PMC5870800)
Supplement: NIHMS950867-supplement-Supplemental_Table_3.pdf [file NIHMS950867-supplement-Supplemental_Table_3.pdf]

Table S3: Comparison (paired t-test) of neuropsychological (NP) tests at different time points in relation to renal transplant. MMSE, mini mental state exam.

**a) Within subject comparison between three-month (post-transplant 1) and one-year (post-transplant 2) post-transplant neuropsychological (NP) tests**

| <b>Test</b>       | <b>Post-transplant 1<br/>(mean ± Sd dev)</b> | <b>Post-transplant 2<br/>(mean ± Sd dev)</b> | <b><i>p</i><br/>(n=8)</b> |
|-------------------|----------------------------------------------|----------------------------------------------|---------------------------|
| MMSE              | 28.0 ± 2.6                                   | 28.1 ± 2.7                                   | 0.76                      |
| Digit Span        | 6.9 ± 1.7                                    | 6.9 ± 1.7                                    | 0.83                      |
| Logical Memory I  | 13.6 ± 4.4                                   | 13.4 ± 4.8                                   | 0.77                      |
| Logical Memory II | 12.50 ± 4.60                                 | 12.50 ± 5.32                                 | 1.00                      |
| Category Fluency  | 18.2 ± 4.7                                   | 19.4 ± 4.9                                   | 0.37                      |
| Trail making      | 55.3 ± 22.7                                  | 55.4 ± 22.1                                  | 0.96                      |
| Digit Symbol      | 46.6 ± 10.7                                  | 46.5 ± 11.8                                  | 0.94                      |
| Block Design      | 30.3 ± 11.5                                  | 34.0 ± 12.1                                  | 0.03*                     |
| Stroop Test       | 38.0 ± 5.4                                   | 41.3 ± 7.3                                   | 0.14                      |
| Free recall       | 29.4 ± 5.0                                   | 30.3 ± 3.5                                   | 0.72                      |

**b) Within subject comparison between baseline pre-transplant (pre-transplant 1) and 1 year repeat pre-transplant (pre-transplant 2) neuropsychological (NP) tests**

| <b>Test</b>       | <b>Pre-transplant 1<br/>(mean ± Sd dev)</b> | <b>Pre-transplant 2<br/>(mean ± Sd dev)</b> | <b><i>p</i><br/>(n=4)</b> |
|-------------------|---------------------------------------------|---------------------------------------------|---------------------------|
| MMSE              | 27.0 ± 2.1                                  | 25.8 ± 2.3                                  | 0.08                      |
| Digit Span        | 5.4 ± 1.0                                   | 6.0 ± 1.8                                   | 0.45                      |
| Logical Memory I  | 11.8 ± 5.2                                  | 12.8 ± 5.5                                  | 0.57                      |
| Logical Memory II | 11.3 ± 5.2                                  | 10.8 ± 5.9                                  | 0.64                      |
| Category Fluency  | 27.4 ± 0.8                                  | 25.6 ± 7.9                                  | 0.48                      |
| Trail making      | 67.4 ± 28.0                                 | 64.5 ± 32.3                                 | 0.46                      |
| Digit symbol      | 46.3 ± 11.9                                 | 44.5 ± 10.2                                 | 0.35                      |
| Block Design      | 32.0 ± 9.7                                  | 28.5 ± 8.4                                  | 0.62                      |
| Stroop Test       | 40.8 ± 8.3                                  | 39.0 ± 9.8                                  | 0.42                      |
| Free recall       | 26.0 ± 2.2                                  | 29.3 ± 6.8                                  | 0.43                      |
